# Supplementary material for: Green synthesized selenium doped zinc oxide nano-antibiotic: synthesis, characterization and evaluation of antimicrobial, nanotoxicity and teratogenicity potential
Source: Royal Society of Chemistry journal article supplement (doi:10.1039/d0tb01553a), 2020-01-01
Supplement: d0tb01553a1.pdf [file d0tb01553a1.pdf]

## Supplementary Material

### Green synthesized selenium doped zinc oxide nano-antibiotic: Synthesis, characterization and evaluation of antimicrobial, nanotoxicity and teratogenicity potential

Abdul Majeed<sup>a,‡</sup>, Faryal Javed<sup>a,‡</sup>, Sundus Akhtar<sup>b</sup>, Uzma Saleem<sup>c</sup>, Fareeha Anwar<sup>a</sup>, Bashir Ahmad<sup>a</sup>, Akhtar Nadhman<sup>d</sup>, Gul Shahnaz<sup>e</sup>, Irshad Hussain<sup>f</sup>, Syed Zajif Hussain<sup>f\*</sup> and Muhammad Farhan Sohail<sup>a,f\*</sup>

<sup>a</sup> Riphah Institute of Pharmaceutical Sciences (RIPS), Riphah International University, Lahore Campus, Lahore, Pakistan.

<sup>b</sup> Department of Biotechnology, Minhaj University, Lahore, Pakistan.

<sup>c</sup> Department of Pharmacy, Government College University (GCU), Faisalabad, Pakistan.

<sup>d</sup> Institute of Integrative Biosciences, CECOS University, Phase VI, Hayatabad, Peshawar, Pakistan.

<sup>e</sup> Department of Pharmacy, Faculty of Biological Sciences, Quaid-i-Azam University, Islamabad, 45320, Pakistan.

<sup>f</sup> Department of Chemistry and Chemical Engineering, SBA School of Science and Engineering (SBA-SSE), Lahore University of Management Sciences (LUMS), Lahore - 54792, Pakistan.

<sup>‡</sup> Authors with equal contributions in the manuscript.

#### \*Correspondence

**Muhammad Farhan Sohail, Ph.D.**

Riphah Institute of Pharmaceutical Sciences (RIPS), Riphah International University, Lahore Campus, Lahore, Pakistan. **Contact No.** +92-344-4120001, **E-mail:** [farmacist.pk@gmail.com](mailto:farmacist.pk@gmail.com)

**Syed Zajif Hussain**

Department of Chemistry and Chemical Engineering, SBA School of Science and Engineering (SBA-SSE), Lahore University of Management Sciences (LUMS), Lahore - 54792, Pakistan. E-mail: [syed.hussain@lums.edu.pk](mailto:syed.hussain@lums.edu.pk)

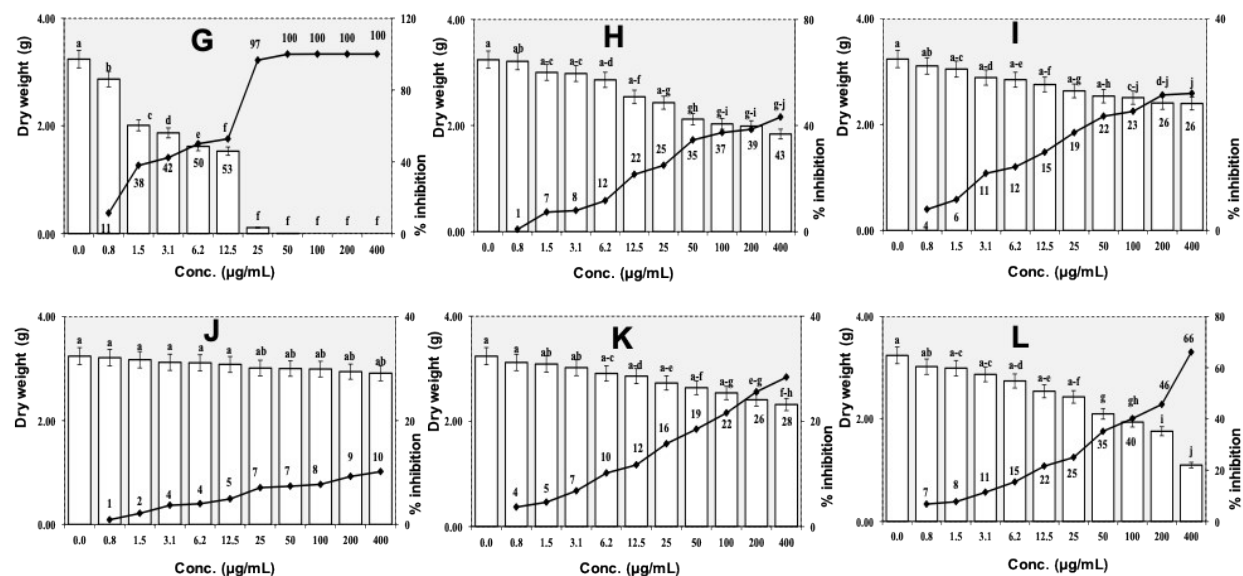

**Figure S1:** The growth inhibitory (%) effect of MRSA (right y-axis) and dried weight reduction (%) of MRSA (left Y-axis) against different concentrations (400-0.8 µg mL<sup>-1</sup>) of various treatments after 24 h of incubation. Where A) Se-ZnO-NAB, B) Ciprofloxacin, C) Gentamycin, D) Ceftriaxone, E) Ampicillin and F) Vancomycin. The results are presented as standard errors of means (SEM) of three replicates. Values with different letters at their top show a significant difference ( $p \leq 0.01$ ) as determined by least significance difference (LSD) Test.

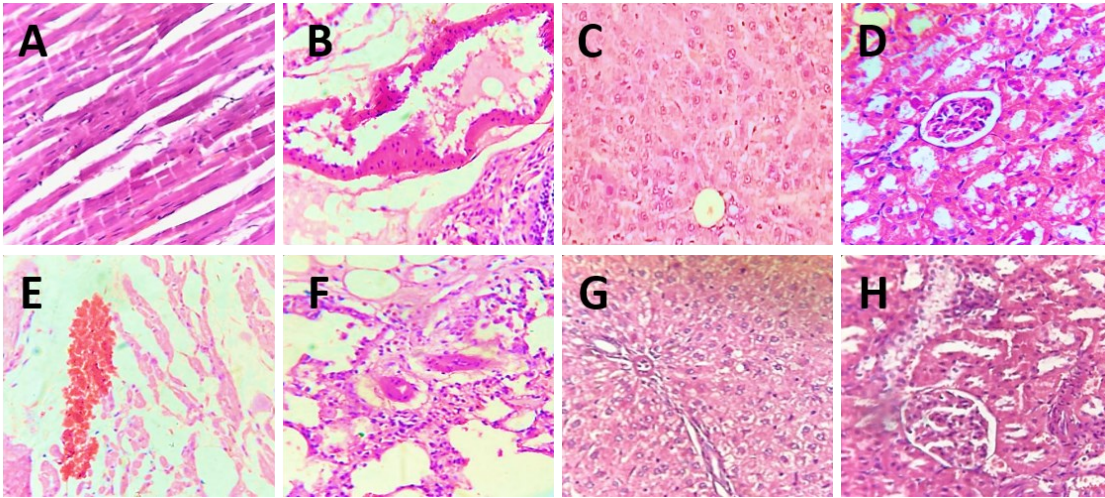

**Figure S2:** Histopathological analysis of pregnant dams (teratogenic study) (A) heart of control group, (B) lungs of control group, (C) liver of control group, (D) kidney of control group, whereas, (E) heart of control group, (F) lungs of control group, (G) liver of control group, (H) kidney of control group. The images were taken at 100 x optical zoom.

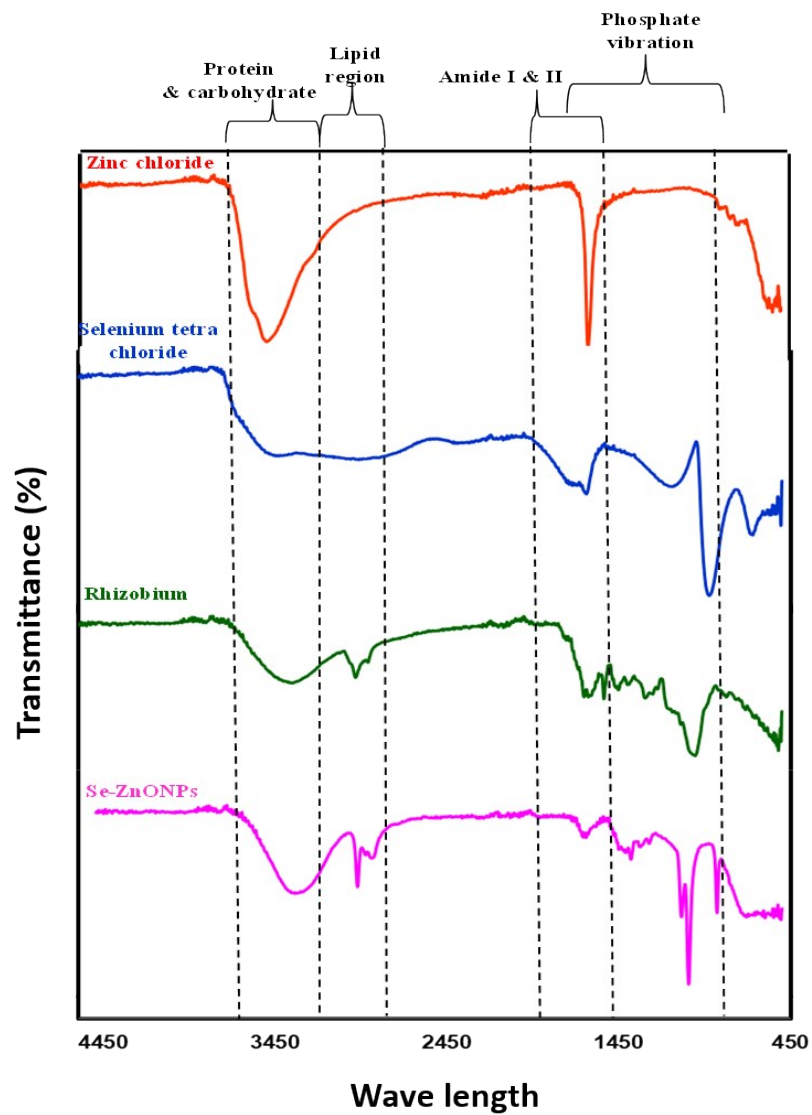

**Figure S3:** Fourier transformed infrared (FTIR) spectrograph showing characteristic peaks of zinc chloride, selenium tetrachloride, *Curcuma longa* extract and Se-ZnO-NAB.
